# Supplementary material for: Acetylene hydrogenation over structured Au–Pd catalysts
Source: Royal Society of Chemistry journal article supplement (doi:10.1039/c5fd00188a), 2015-11-24
Supplement: c5fd00188a1.pdf [file c5fd00188a1.pdf]

### Supporting information

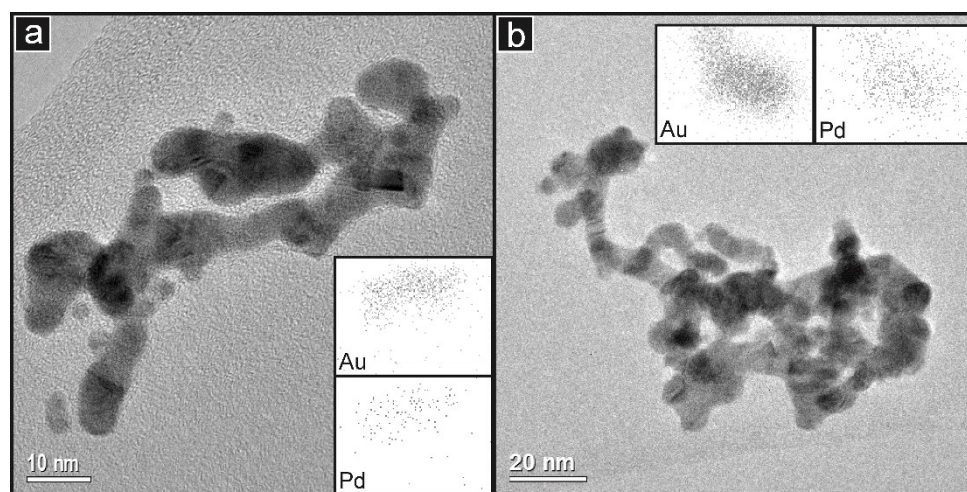

Supporting information figure S1 - TEM images of groups of unsupported 1.5Pd(Au) nanoparticles (after centrifugation) along with the corresponding EDS elemental maps for Au and Pd.

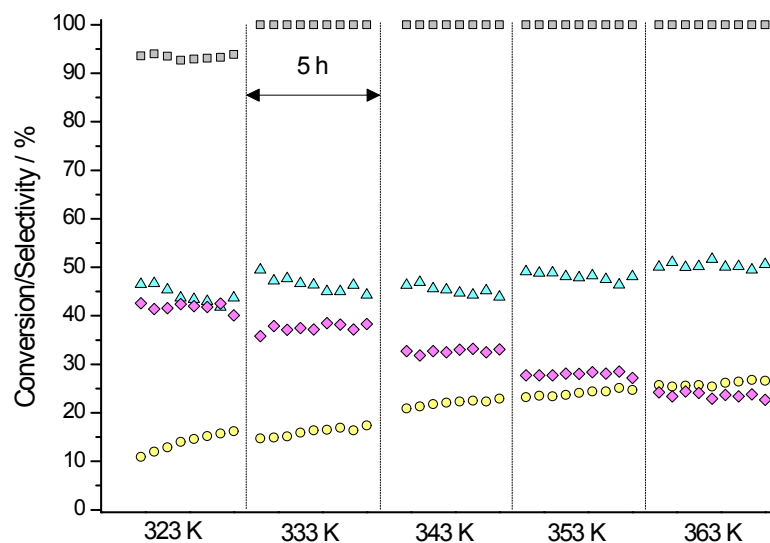

Supporting information figure S2 - Time on stream data (5 h periods) for 1.5Pd(Au) for at temperature between 323-363 K using a  $\text{H}_2$ : acetylene ratio of 1.8:1. Acetylene conversion (grey squares), ethylene selectivity (yellow circles), ethane (cyan triangles) and oligomer selectivity (pink diamonds).

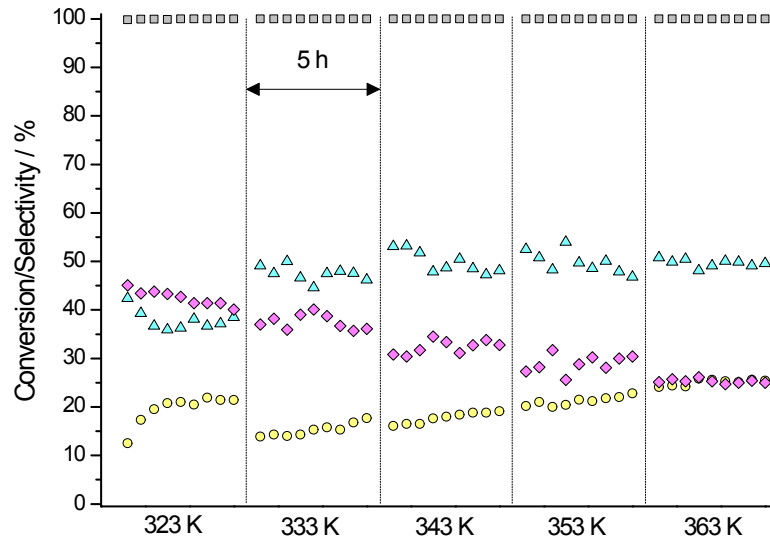

Supporting information figure S3 - Time on stream data (5 h periods) for 3.3Pd(Au) for at temperature between 323-363 K using a  $\text{H}_2$ : acetylene ratio of 1.8:1. Acetylene conversion (grey squares), ethylene selectivity (yellow circles), ethane (cyan triangles) and oligomer selectivity (pink diamonds).
